# Supplementary material
Source: publisher figshare collection journal article supplement (https://acs.figshare.com/ndownloader/files/17449199)
Supplement: Supplementary file 1 [file 17449199]

## Supplementary Materials

**A novel multi-functional Zn-MOF fluorescent probe demonstrating unique sensitivity and selectivity for detection of PA and Fe<sup>3+</sup> ions in water solution**

*Xinrui Zhuang, Xiao Zhang\*, Nanxi Zhang, Yan Wang, Liyan Zhao, Qingfeng Yang*

### Caption of Figure

**Figure S1** A view of the asymmetric unit and some symmetry-related atoms in **1**.

Symmetry codes: (i) 1-x, 0.5+y, 0.5-z. (ii) 1-x, -0.5+y, 0.5-z. (iii) 1+x, 0.5-y, -0.5+z. (iv) 2-x, -0.5+y, 1.5-z. (v) 3-x, -y, 1-z.

**Figure S2** The PXRD pattern of compound **1** (black: simulated from the single-crystal data, red: synthesized).

**Figure S3** The IR spectral of **1**

**Figure S4** Thermogravimetric analysis curve of compound **1**.

**Figure S5** The PXRD of **1** immersed in acid-based solution with different pH at room temperature.

**Figure S6** The PXRD of compound **1** immersed in different organic solvents at room temperature.

**Figure S7** SEM image of **1** under solution treatment condition (a: blank, b: water, c: DMF, d: Toluene, e: pH = 2, f: pH = 12)

**Figure S8** The solid emission spectral of ligands and **1**.

**Figure S9** Emission spectra of **1** and free tpt ligand dispersed in water when excited at 282 nm, respectively.

**Figure S10** The fluorescence spectral of **1** in different value of pH solution at 282 nm excitation

**Figure S11** The fluorescence spectral of **1** in various organic solvents at 282 nm excitation.

**Figure S12** The luminescence intensity of **1** upon incremental addition of NACs solution (5 mM) in water. (a: 2,4-DNT; b: NB; c: *p*-NT; d: *m*-DNB; e: *m*-NT; f: *o*-NT; g: *o*-Np; h: *p*-Np;).

**Figure S13** Emission (at 385 nm) of compound **1** at different concentrations of PA, normalized between the minimum emission ( $3.3 \times 10^{-6}$  M) and the maximum emission intensity ( $8.0 \times 10^{-5}$  M). The detection limit was determined to be  $2.56 \times 10^{-6}$  M.

**Figure S14** HOMO and LUMO energy of NACs and ligands.

**Figure S15** The PXRD pattern of **1** after dealing with PA.

**Figure S16** The absorbency spectral of difference NACs and emission spectral of **1**.

**Figure S17** Emission spectra of **1** dispersed in different metal ions solvents when excited at 282 nm.

**Figure 18.** Emission (at 385 nm) of compound **1** at different concentrations of  $\text{Fe}^{3+}$ , the detection limit was determined to be  $4.72 \times 10^{-6}$  M.

**Figure 19** (a) The luminescence intensity of **1** interacting with different metal ions in water solution with and without  $\text{Fe}^{3+}$  ions. (b) The luminescence intensity of **1** upon the addition of different metal ions followed by  $\text{Fe}^{3+}$  ions.

**Figure S20** The luminescence intensity of **1** and that found after three recycles; the

inserted image indicates the luminescence intensity of **1** can be recovered from  $\text{Fe}^{3+}$ -**1**.

**Figure S21** The Powder X-ray diffraction patterns of **1** after cyclic sensing  $\text{Fe}^{3+}$  ions.

**Figure S22** The absorption band of different metal ions solution at UV-vis light and emission spectral of **1**.

**Figure S23** The PXRD pattern of **1** after dealing with  $\text{Fe}^{3+}$  ion solution.

**Figure S24** The XPS of  $\text{Fe}^{3+}$ -**1** shows the typical peak of  $\text{Fe}^{3+}$  at 710 eV.

### **Caption of Table**

**Table S1** Selected bond lengths (Å) and angles (°) for **1**.

**Table S2** HOMO and LUMO energies for calculated NACs at B3LYP/6-31G\* level of theory.

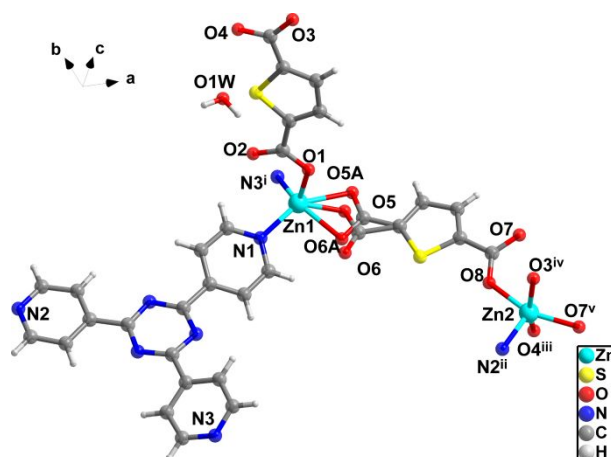

**Figure S1.** A view of the asymmetric unit and some symmetry-related atoms in **1**. Symmetry codes: (i)  $1-x, 0.5+y, 0.5-z$ . (ii)  $1-x, -0.5+y, 0.5-z$ . (iii)  $1+x, 0.5-y, -0.5+z$ . (iv)  $2-x, -0.5+y, 1.5-z$ . (v)  $3-x, -y, 1-z$ .

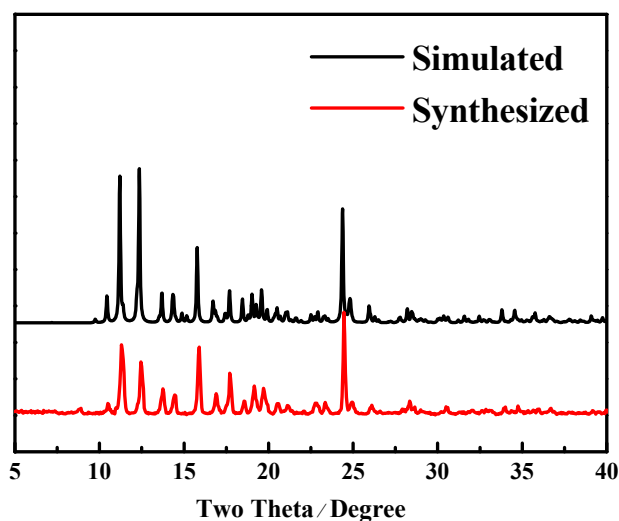

**Figure S2.** The PXRD pattern of compound **1** (black: simulated from the single-crystal data, red: synthesized).

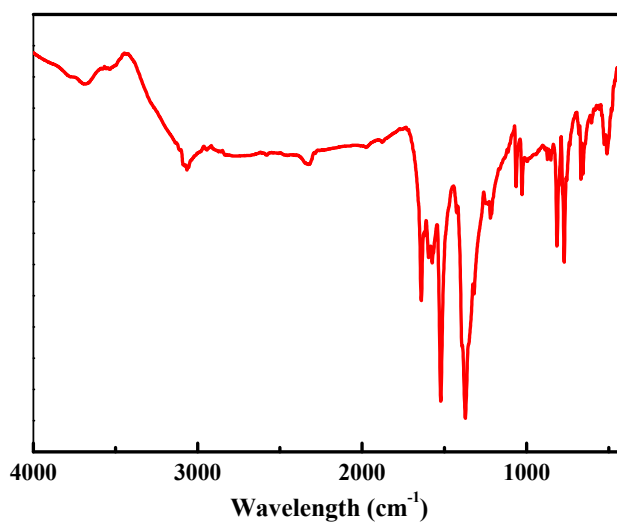

**Figure 3** The IR spectral of **1**

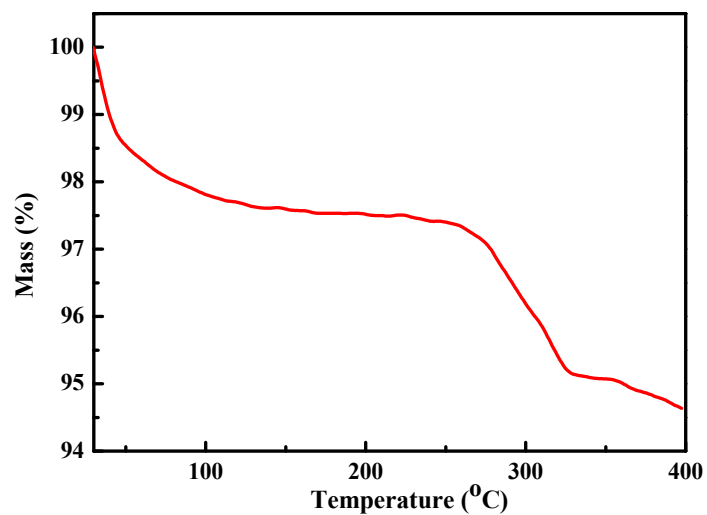

**Figure S4** Thermogravimetric analysis curve of compound **1**.

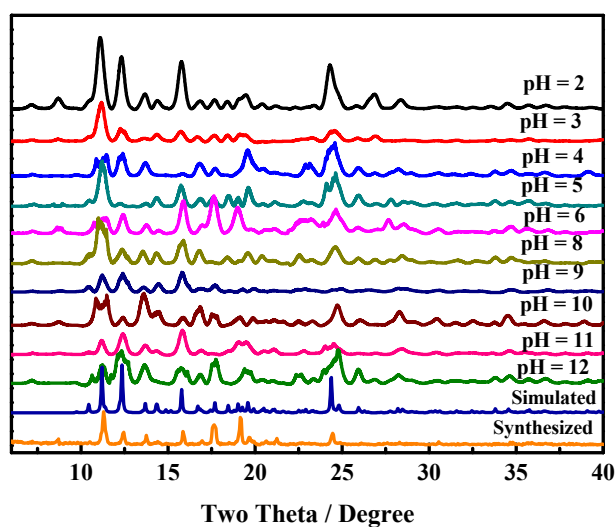

**Figure S5.** The PXRD of **1** immersed in acid-based solution with different pH at room temperature.

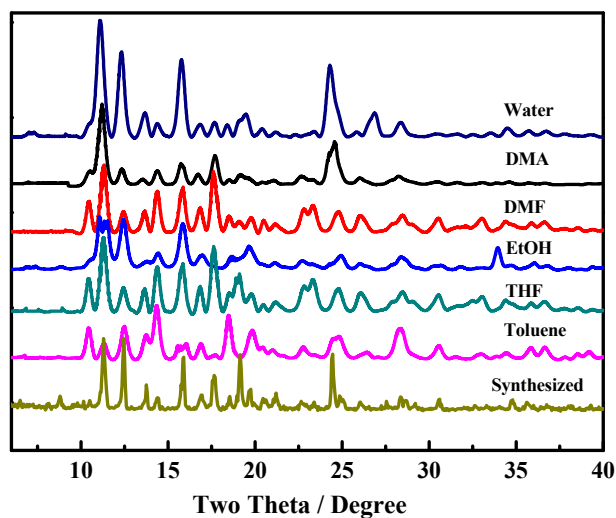

**Figure S6.** The PXRD of compound **1** immersed in different organic solvents at room

temperature.

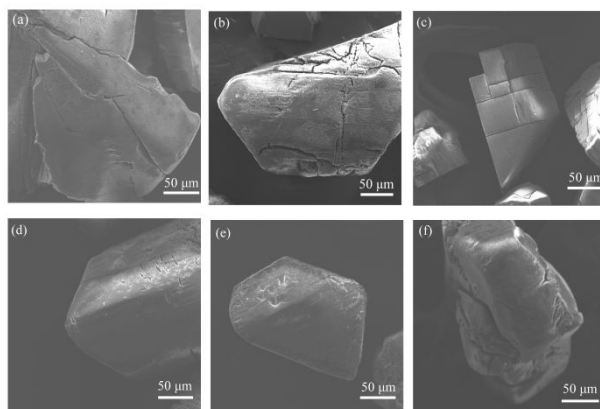

**Figure S7** SEM image of **1** under solution treatment condition (a: blank sample, b: water, c: DMF, d: Toluene, e: pH = 2, f: pH = 12)

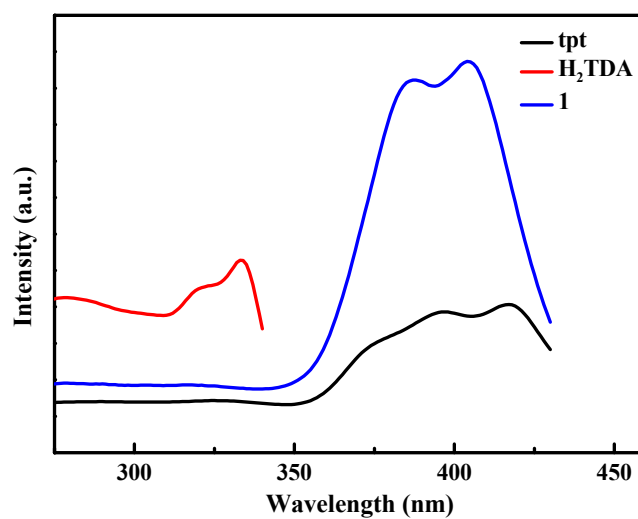

**Figure S8.** The solid emission spectral of ligands and **1**.

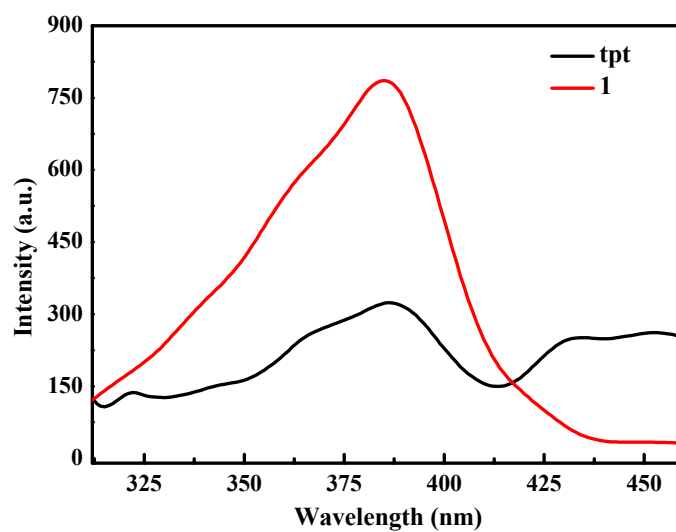

**Figure S9.** Emission spectra of **1** and free tpt ligand dispersed in water when excited at 282 nm, respectively.

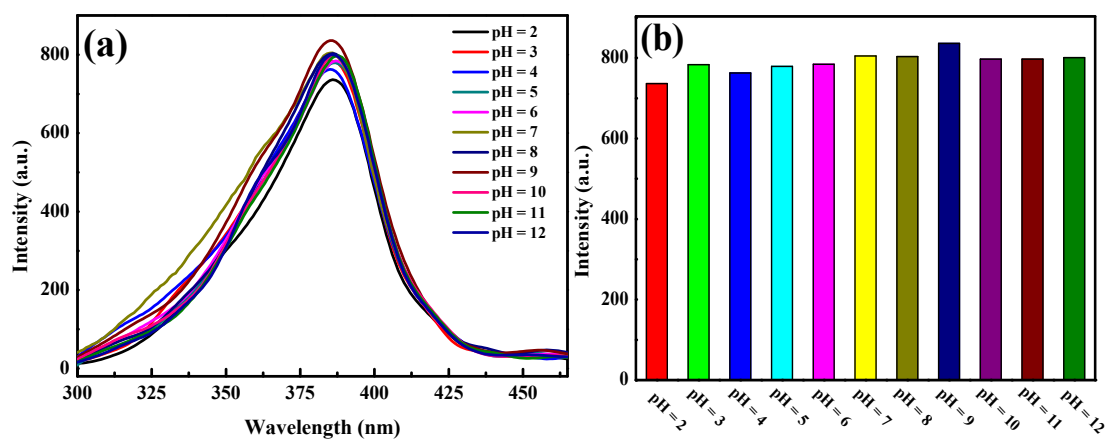

**Figure S10** The fluorescence spectral of **1** in different value of pH solution at 282 nm excitation

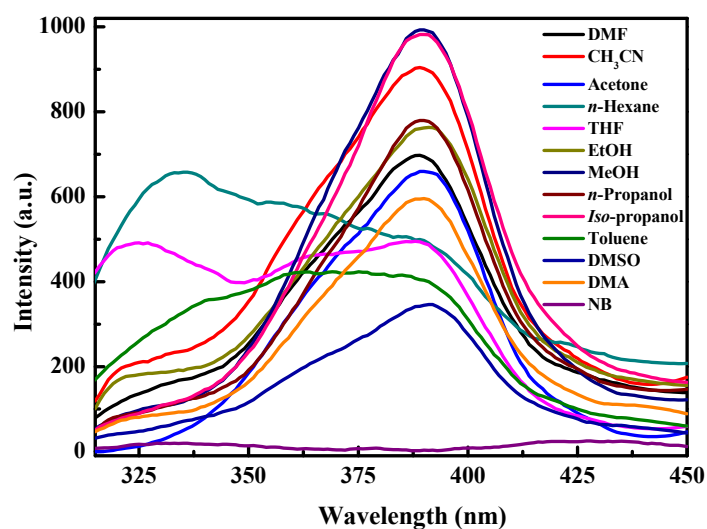

**Figure S11.** The fluorescence spectral of **1** in various organic solvents at 282 nm excitation.

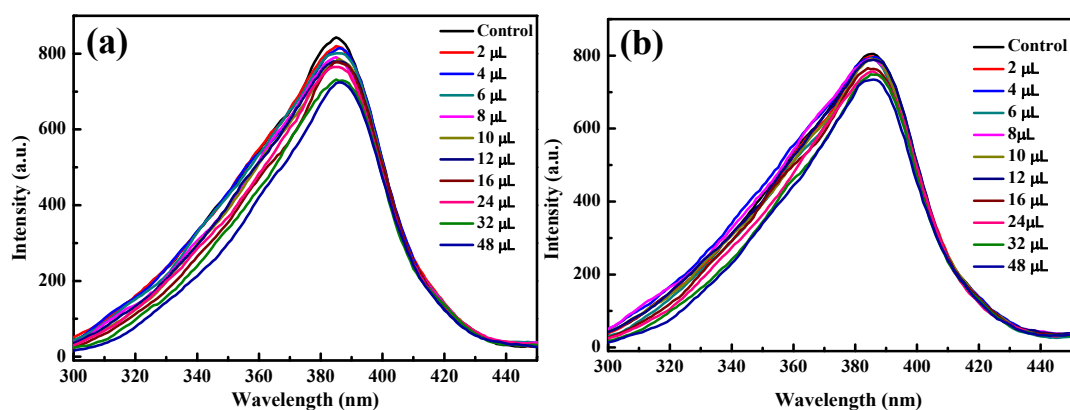

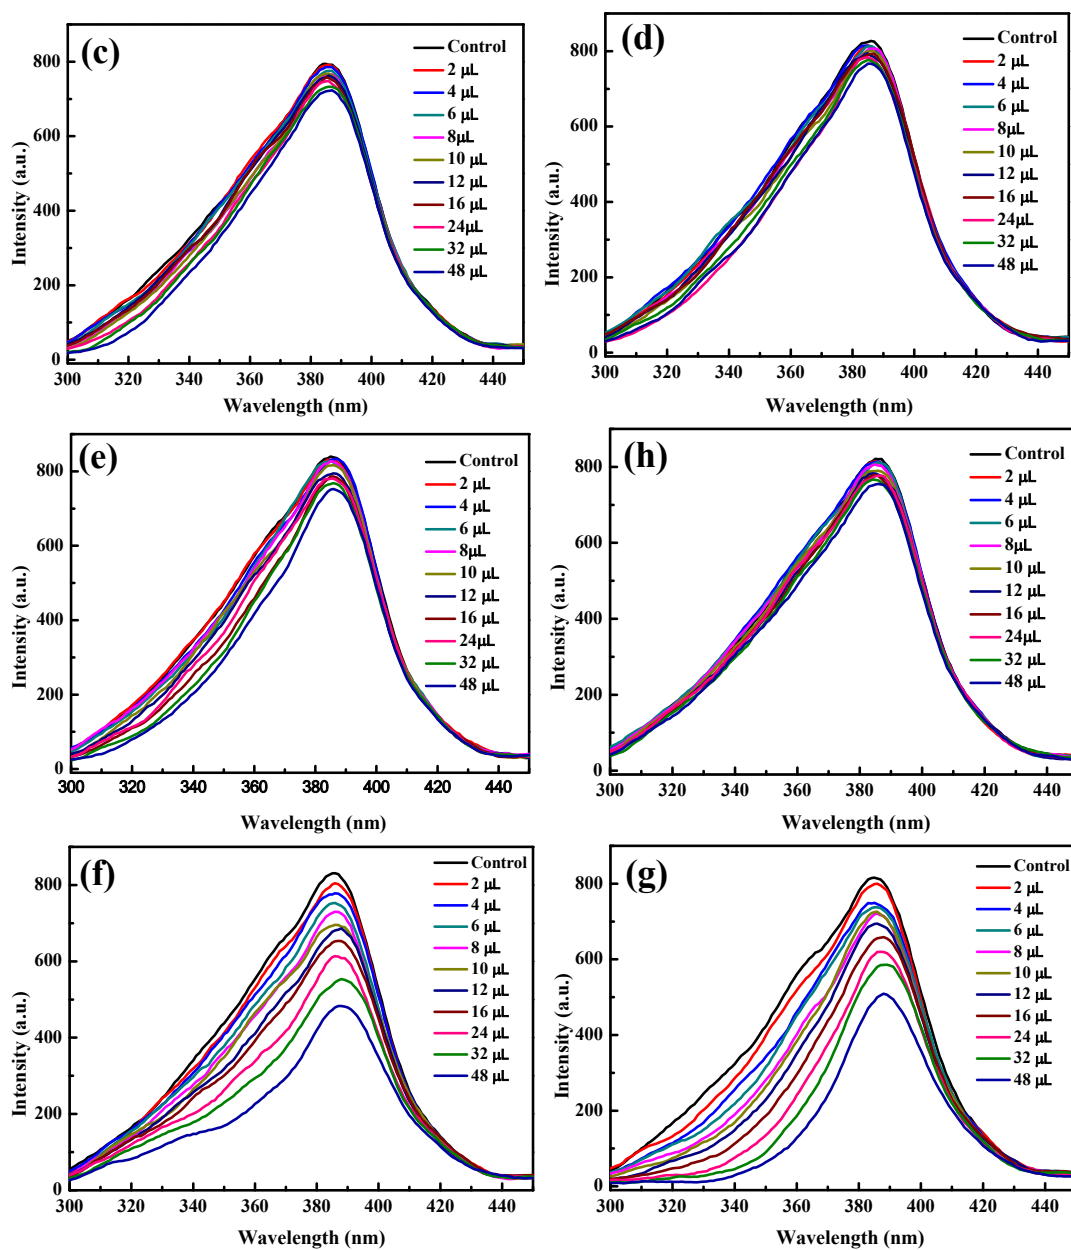

**Figure S12.** The luminescence intensity of **1** upon incremental addition of NACs solution (5 mM) in water. (a: 2,4-DNT; b: NB; c: *p*-NT; d: *m*-DNB; e: *m*-NT; f: *o*-NT; g: *o*-Np; h: *p*-Np).



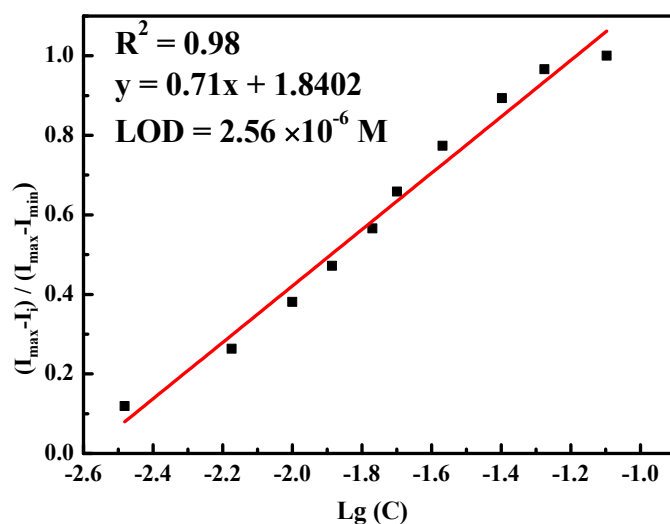

**Figure S13.** Emission (at 385 nm) of compound **1** at different concentrations of PA, normalized between the minimum emission ( $3.3 \times 10^{-6} \text{ M}$ ) and the maximum emission intensity ( $8.0 \times 10^{-5} \text{ M}$ ). The detection limit was determined to be  $2.56 \times 10^{-6} \text{ M}$ .

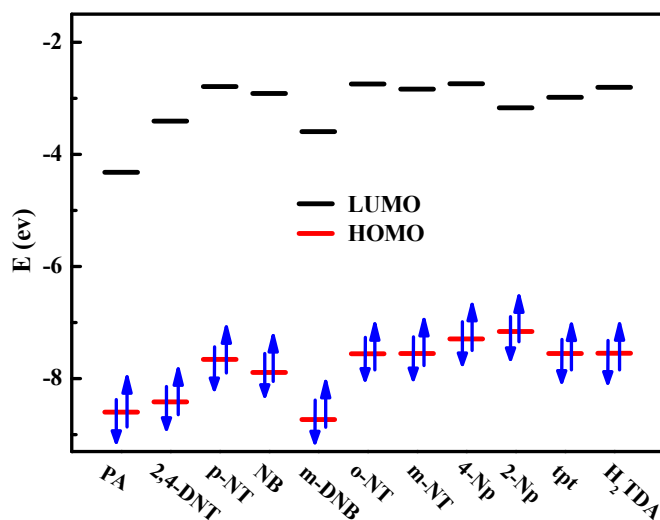

**Figure S14.** HOMO and LUMO energy of NACs and ligands.

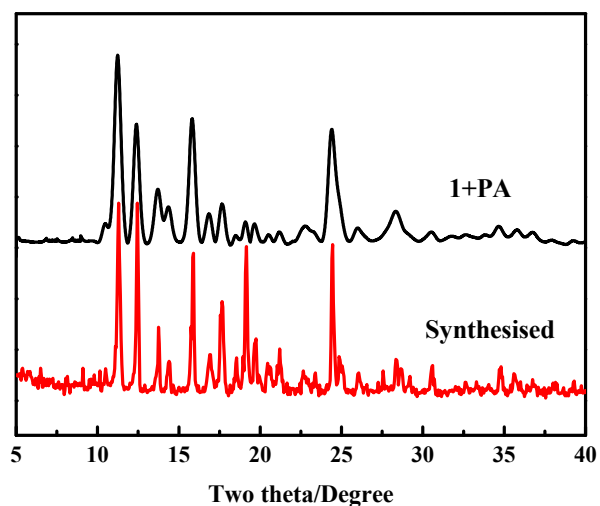

**Figure S15.** The PXRD pattern of **1** after dealing with PA.

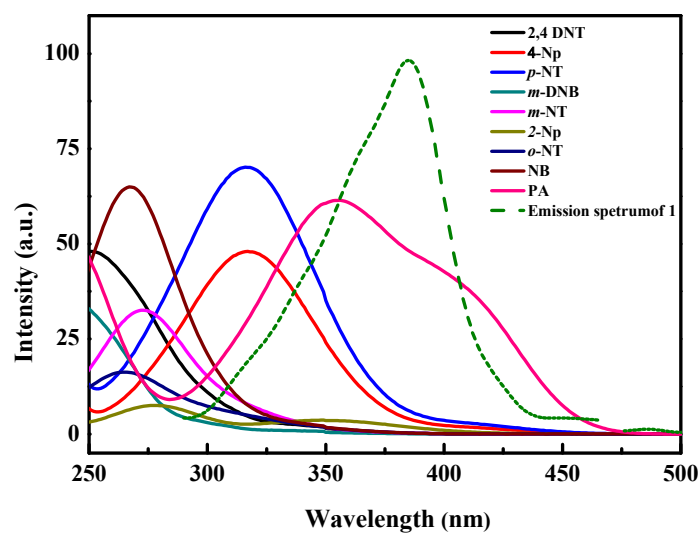

**Figure S16.** The absorbency spectral of difference NACs and emission spectral of **1**.

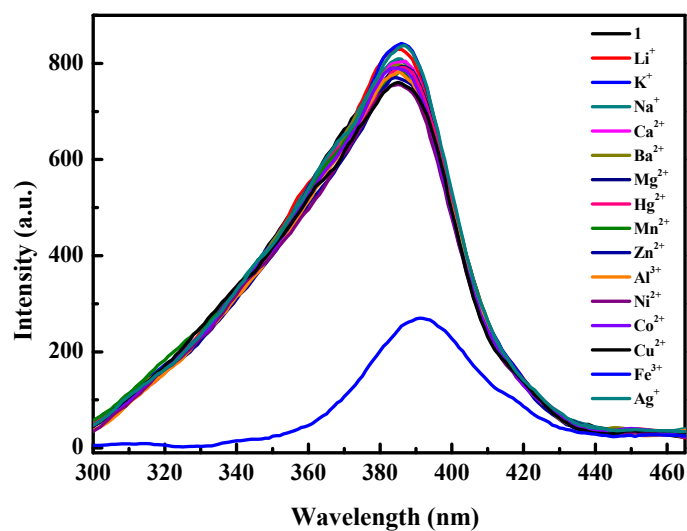

**Figure S17.** Emission spectra of **1** dispersed in different metal ions solvents when excited at 282 nm.

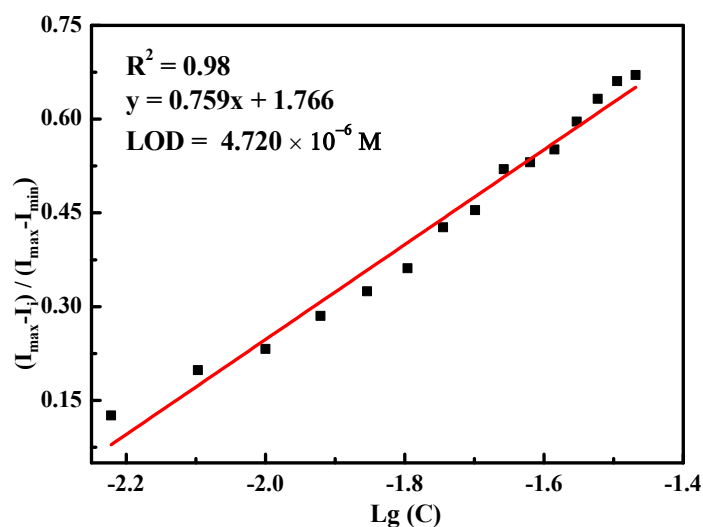

**Figure 18.** Emission (at 385 nm) of compound **1** at different concentrations of  $\text{Fe}^{3+}$ , the detection limit was determined to be  $4.72 \times 10^{-6} \text{ M}$ .

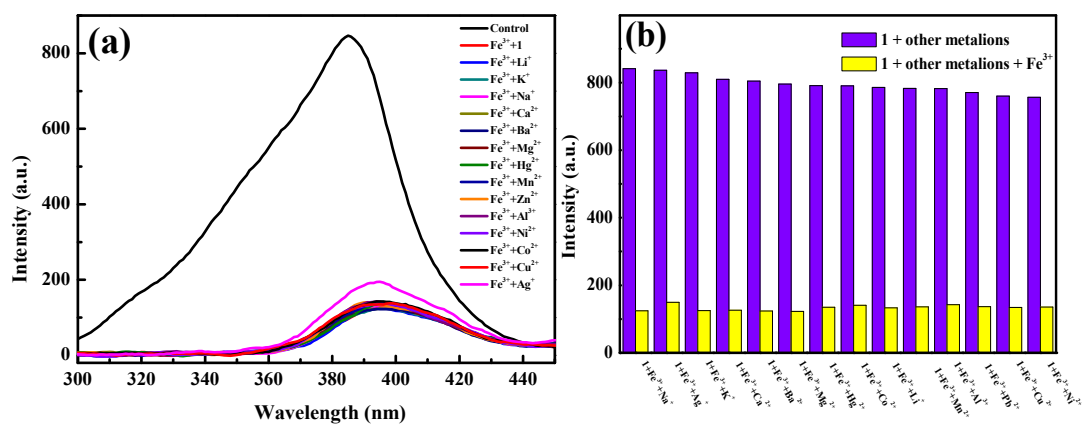

**Figure 19.** (a) The luminescence intensity of **1** interacting with different metal ions in water solution with and without  $\text{Fe}^{3+}$  ions. (b) The luminescence intensity of **1** upon the addition of different metal ions followed by  $\text{Fe}^{3+}$  ions.

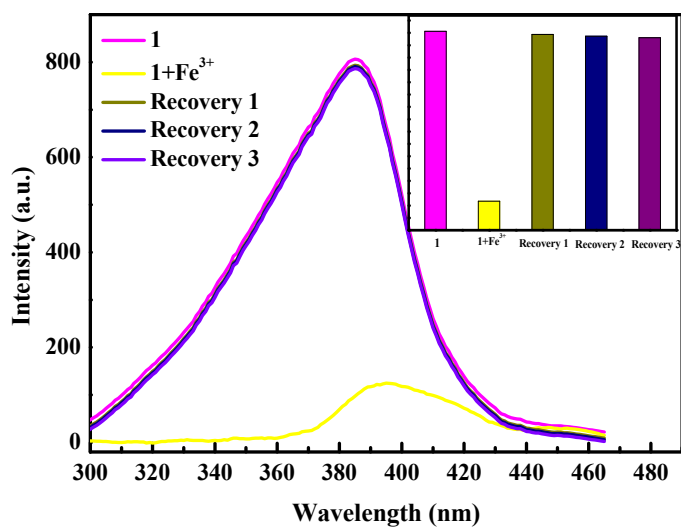

**Figure S20.** The luminescence intensity of **1** and that found after three recycles; the inserted image indicates the luminescence intensity of **1** can be recovered from  $\text{Fe}^{3+}$ -**1**.

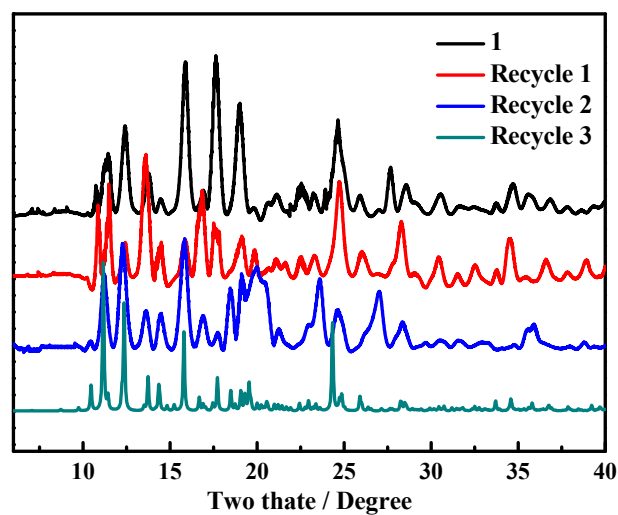

**Figure S21.** The powder X-ray diffraction patterns of **1** after cyclic sensing  $\text{Fe}^{3+}$  ions.

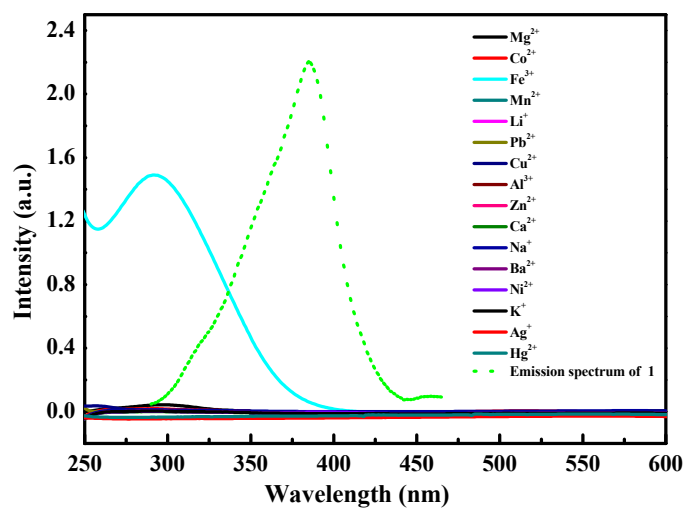

**Figure S22.** The absorption band of different metal ions solution at UV-vis light and emission spectral of **1**.

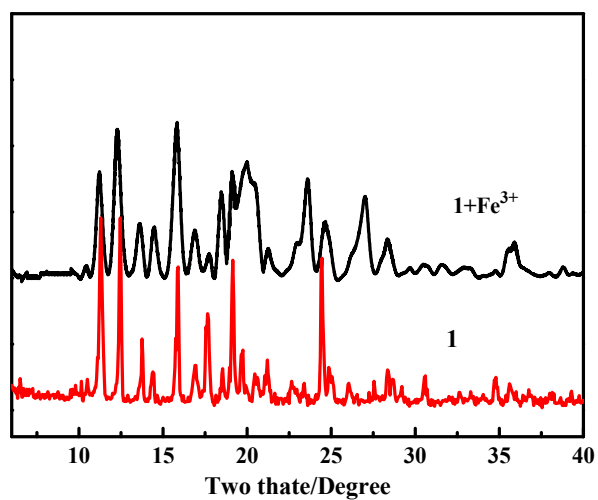

**Figure S23.** The PXRD pattern of **1** after dealing with Fe<sup>3+</sup> ion solution.

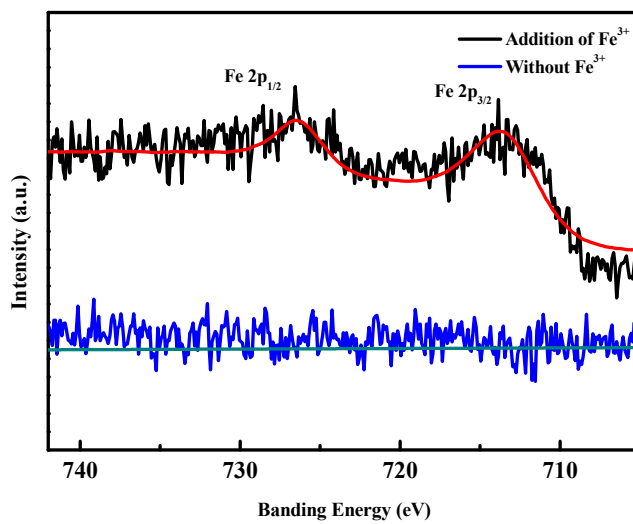

**Figure S24.** The XPS of Fe<sup>3+</sup>-**1** shows the typical peak of Fe<sup>3+</sup> at 710 eV.

**Caption of Table****Table S1.** Selected bond lengths (Å) and angles (o) for **1**.

|                         |            |                                      |            |
|-------------------------|------------|--------------------------------------|------------|
| Zn1-O1                  | 1.9678(18) | Zn2-Zn2 <sup>2</sup>                 | 3.0129(6)  |
| Zn1-O5                  | 1.901(6)   | Zn2-O3 <sup>3</sup>                  | 2.027(2)   |
| Zn1-N1                  | 2.0464(19) | Zn2-O7 <sup>2</sup>                  | 2.0388(18) |
| Zn1-N3 <sup>1</sup>     | 2.067(2)   | Zn2-O8                               | 2.0358(19) |
| Zn1-O6A                 | 2.188(11)  | Zn2-N2 <sup>5</sup>                  | 2.0601(18) |
| O1-Zn1-N1               | 111.82 (8) | O1-Zn1-C7                            | 93.5 (2)   |
| O1-Zn1-O5A              | 88.9 (3)   | O5-Zn1-N1                            | 129.8 (3)  |
| N1-Zn1-N3 <sup>1</sup>  | 100.6 (3)  | N1-Zn1-O5A                           | 149.4 (3)  |
| O3 <sup>2</sup> -Zn2-O8 | 88.40 (9)  | O4 <sup>4</sup> -Zn2-N2 <sup>5</sup> | 108.98 (8) |

<sup>1</sup>1-X, 1/2+Y, 1/2-Z; <sup>2</sup>3-X, -Y, 1-Z; <sup>3</sup>2-X, -1/2+Y, 3/2-Z; <sup>4</sup>1+X, 1/2-Y, -1/2+Z; <sup>5</sup>1-X, -1/2+Y, 1/2-Z

**Table S2.** HOMO and LUMO energies for calculated NACs at B3LYP/6-31G\* level of theory.

| Analytes      | HOMO (ev) | LUMO (ev) | Bond gap |
|---------------|-----------|-----------|----------|
| PA            | -8.59516  | -4.32093  | 4.27432  |
| 2,4-DNT       | -8.41361  | -3.40910  | 5.00450  |
| <i>p</i> -NT  | -7.65502  | -2.79225  | 4.86279  |
| NB            | -7.88778  | -2.91263  | 4.97515  |
| <i>m</i> -DNB | -8.73052  | -3.59610  | 5.13441  |
| <i>o</i> -NT  | -7.55477  | -2.74677  | 4.80799  |
| <i>m</i> -NT  | -7.55031  | -2.83893  | 4.71137  |
| 4-Np          | -7.29006  | -2.73967  | 4.55039  |

|                    |          |          |         |
|--------------------|----------|----------|---------|
| 2-Np               | -7.16037 | -3.17267 | 3.98770 |
| tpt                | -7.55367 | -2.98348 | 4.57019 |
| H <sub>2</sub> TDA | -7.54931 | -2.80524 | 4.74407 |

---
